# Supplementary material
Source: Research Square preprint supplement (doi:10.21203/rs.3.rs-9382393/v1)
Supplement: Supplementary file 1 [file b6edd27aef83b859954ec79e.docx]

**Table 2** Identified and proposed compounds of *Solanum jabrense* Agra & M. Nee.

| No. | r.t. (min) | [M+H] + | Molecular Formula | | Component Name | No. | r.t. (min) | | [M+H] + | | Molecular Formula | | Component Name | |  |
| --- | --- | --- | --- | --- | --- | --- | --- | --- | --- | --- | --- | --- | --- | --- | --- |
| 1. | 4.2 | 8.844.810 | C45H73NO16 | | Solasonine or isomer | **25.** | 6.6 | | 355.2348 | | C16H19O9 | | 5-O-(E)-Caffeoylquinic acid ou 4-O-(E)-Caffeoylquinic acid or 3-O-(E)-Caffeoylquinic acid or isomer | |  |
| 2. | 4.3 | 9.004.757 | C45H73NO17 | | Robeneoside B or isomer | **26.** | 6.8 | | 410.2951 | | C27H39NO2 | | 22α, 23α- Epoxy-solanida-4-en-3-one or isomer | |  |
| 3. | 4.4 | 608.3666 | C33H53NO9 dihidroxisolasodina-hex | | | **27.** | | 6.9 | | 4.123.079 | |  | Solasodine or isomer | | |
| 4. | 4.5 | 902.4917 | C45H75NO17 | | Glucose-Glucose-Galactose-Tomatidine | **28.** | 7.0 | | 412.3079 | | C27H42NO2 | | Solasodine unsaturated | |  |
| 5. | 4.6 | 610.3804 | C29H55NO12 | | 3-amino-hydroxy-dehydro-furostane-22-ol | **29.** | 7.4 | | 334.2846 | | NI | | NI | |  |
| 6. | 4.7 | 9.164.691 | C45H73NO18 | | (3β,12β,22α,25R)-3,12-dihydroxy-spirosol-5-ene-27-oic alcohol-12-O-β-D-glucopyranoside-(1→2)-O-α-L-rhamnopyranosyl | **30.** | 7.5 | | 406.3498 | | NI | | NI | |  |
| 7. | 4.8 | 7.384.260 | C39H63NO12 | | Solanigroside P or isomer | **31.** | 8.1 | | 500.2586 | | C21H21ClO12 | | Delphinidin-3-glucoside chloride | |  |
| 8. | 4.9 | 898.4467 | C46H75NO16 | | HMS-hex-rha-rha (hydroxymethylsolasodine or isomer | **32.** | | 8.4 | | 467.1823 | | NI | | NI | |
| 9. | 5.0 | 9.004.935 | C45H73NO17 | | Robeneoside B or isomer | **33.** | 8.4 | | 371.3177 | | C16H20O10 | | Deacetylasperuloside | |  |
| 10. | 5.1 | 738.4247 | C39H63NO12 | | Solanigroside P or isomer | **34.** | 8.5 | | 445.2003 | | C21H34O10 | | Sacranoside A | |  |
| 11. | 5.2 | 884.4816 | C45H73NO16 | | Solanandaine | **35.** | 8.6 | | 415.1846 | | C19H28O10 | | Phenethyl-β-primeveroside | |  |
| 12. | 5.3 | 916.4772 | C45H73NO18 | | (3β,12β,22α,25R, -3,12-dihidroxi-espirosol-5-em-27-oic alcool-12-O-beta-D- lucopiranoside- (1-2) -O-alfa-L-ramnopiranosil | **36.** | 8.6 | | 432.2285 | | C27 H45 NO3 | | | Isojuripidine |  |
| 13. | 5.3 | 1000.5319 | C50H81 N O19 | | Arudonine | **37.** | 8.7 | | 304.2932 | | NI | | | NI |  |
| 14. | 5.4 | 868.5095 | C45H73NO15 | | Solamargine | **38.** | 9.0 | | 330.3330 | | NI | | | NI |  |
| 15. | 5.5 | 414.3270 | C27H43NO2 | | Solasodine or isomer | **39.** | 9.1 | | 346.3205 | | C19H22O6 | | (3R,4S)-3,4-Dihydroxy-3-(3',4'-dimethoxy benzyl)-7-methoxy-chroman | |  |
| 16. | 5.5 | 754.4328 | C39H63NO13 | | Solasodine-2OH-hex-rha | **40.** | 9.4 | | 529.2005 | | C28H41N4O6 | | N1-Caffeoyl, N14-dihydrocaffeoylspermine | |  |
| 17. | 5.6 | 910.4995 | C47H75NO16 | | Leptine I or isomer | **41.** | 9.7 | | 279.2211 | | C13H12O7 | | p-Coumarylmalicacid | |  |
| 18. | 5.8 | 722.4408 | C39H63NO11 | | β 1-solasonine or β 2- solamargine | **42.** | 10.3 | | 579.2763 | | C26H27O15 | | Luteolin 6-C-β-D-glucopyranoside-8-C-α-L-arabinopyranoside or  Luteolin 7-O-[2-(β-D-apiofuranosyl)-β-d-glucopyranoside] (Isomer  II) | |  |
| 19. | 5.9 | 4.463.150 | C21H32O10 | | (3β,12β,25R) - 3,12-dihydroxy-siprosol-5-en- 27-oic-alcohol or isômero | **43.** | 10.8 | | 417.3233 | | C26H42NO3 | | Veremivirine | |  |
| 20. | 6.0 | 4.432.701 | C21H32O10 | | Dihydrophaseicacid 4’-O-β-D-glucopyranoside | **44.** | | 10.9 | | 315.1479 | | C13H16O | | Gentisoylglucoside isomer1 or isomer | |
| 21. | 6.0 | 751.3780 | NI | | Hydroxy solasodine | **45.** | 11.2 | | 827.4174 | | C35H39O23 | | Luteolin 7-O-(2-apiofuranosyl-4-glucopyranosyl-6-malonyl)  glucopyranoside | |  |
| 22. | 6.1 | 430.3219 | C27 H43 NO | | Hydroxy solasodine | **46.** | 11.8 | | 813.4512 | | NI | | NI | |  |
| 23. | 6.4 | 428.3045 | C27H41NO3 | 22α,23α-Epoxysolasodine or isomer | | **47** | | 12.3 | | 593.2620 | | C27H29O15 | Quercetin 3,7-di-O-α-L-rhamnopyranoside | | |
| 24. | 6.5 | 277.1682 | NI | NI | | **48.** | | 13.6 | | 413.2956 | | NI | NI | | |

NI: Not identified
